# Supplementary material
Source: MDPI journal article supplement (https://www.mdpi.com/2410-3888/7/4/184)
Supplement: s1 [file s1]

Archive with 1 entries (1 files):
- fishes-1762988-supplementary.pdf
