# Supplementary material
Source: MDPI journal article supplement (https://www.mdpi.com/2410-3888/7/4/184)
Supplement: s1 [file s1 › fishes-1762988-supplementary.pdf]

## Supplementary Figures

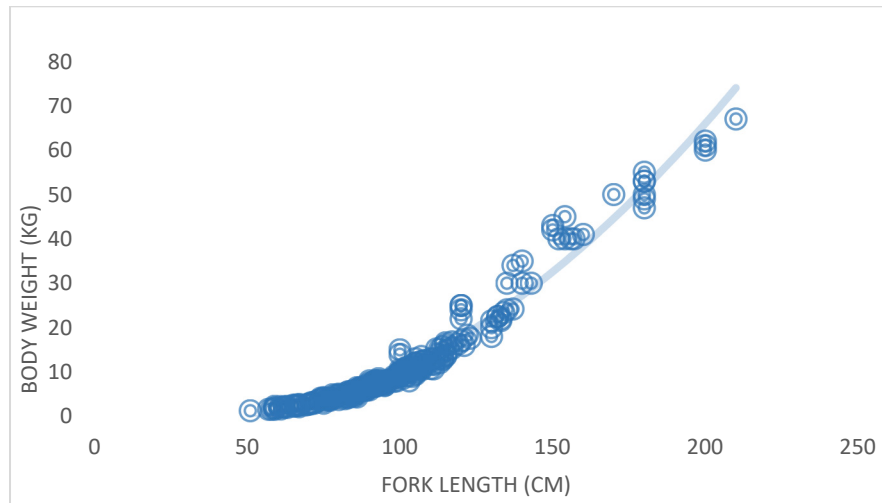

**Figure S1:** Weight-length plot from specimens having weight and length measurements.

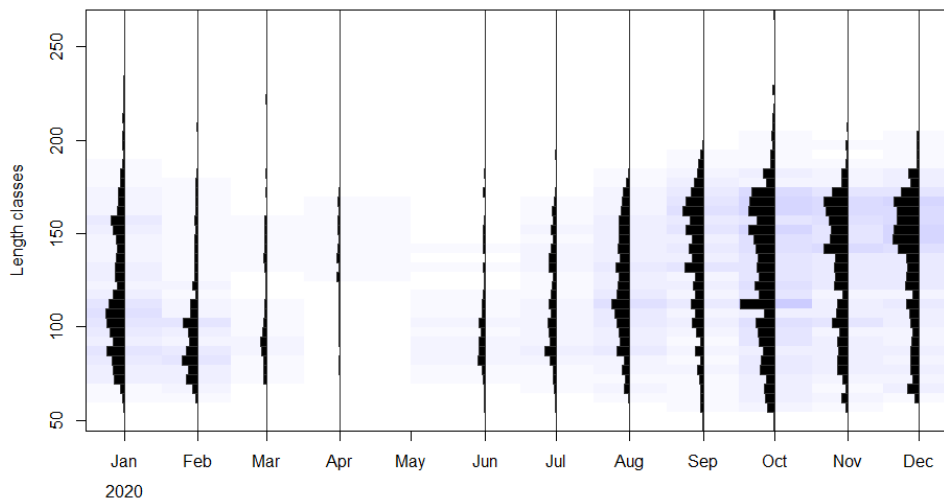

**Figure S2:** The length-frequency distribution of the silky shark for aggregated catch years as presented by TropFishR package.

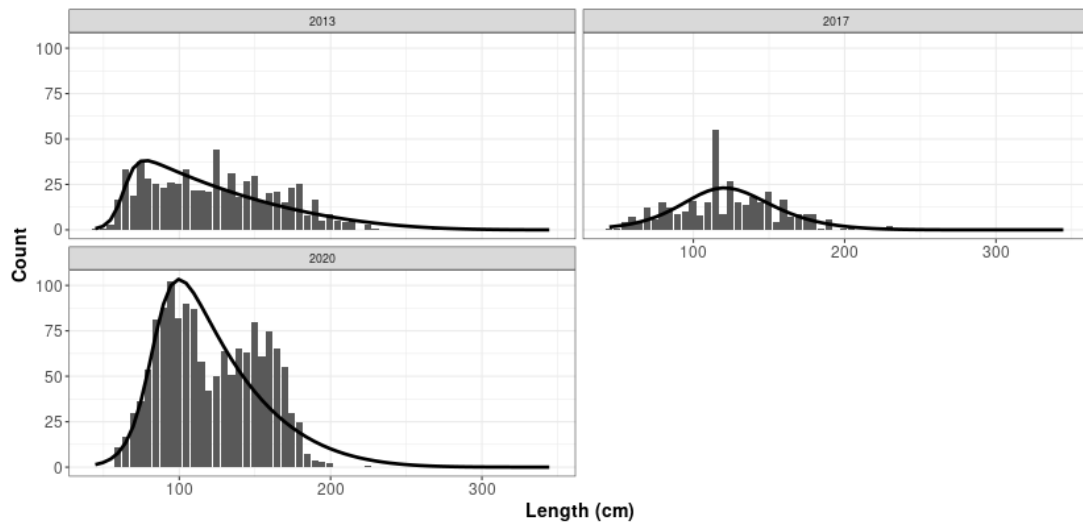

**Figure S3:** Size-frequency distribution of observed fished population, and the solid black line show the predicted fished size composition from the fitted LBSPR model

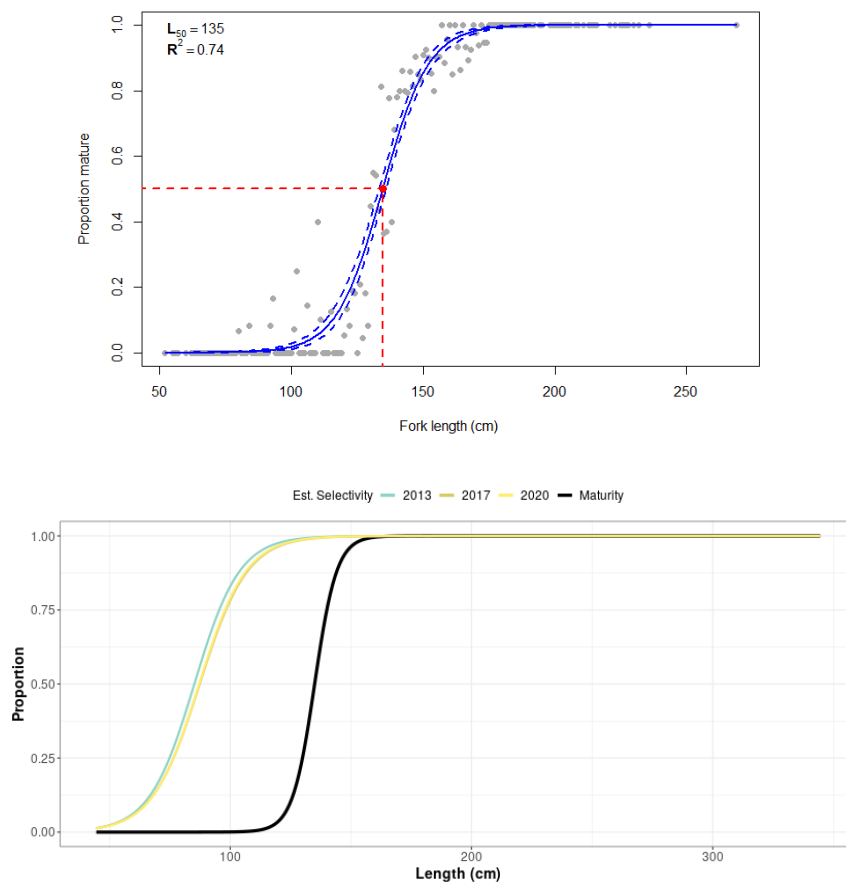

**Figure S4:** Top image: estimated length at 50% sexual maturity ( $L_{50\%}$ ) and Below image: maturity and selectivity curve from the fitted LBSPR model where thick black curve indicated  $L_{50\%}$  and the other colours length at first capture for each analyzed year group.
